# Supplementary material for: Vaccination against RhoC induces long-lasting immune responses in patients with prostate cancer: results from a phase I/II clinical trial
Source: PubMed Central journal article supplement — J Immunother Cancer. 2020 Nov 12;8(2):e001157. doi: 10.1136/jitc-2020-001157 (PMC7662471; doi:10.1136/jitc-2020-001157), 2020-11-12
Supplement: jitc-2020-001157supp001.pdf [file jitc-2020-001157supp001.pdf]

Online supplementary material, Schuhmacher et al.

Supplementary table S1: Inclusion and exclusion criteria of the open label clinical phase I/II study

| Inclusion criteria                                                                                                                                                                                                                                                                                                                                                                                                                                                                                            | Exclusion Criteria                                                                                                                                                                                                                           |
|---------------------------------------------------------------------------------------------------------------------------------------------------------------------------------------------------------------------------------------------------------------------------------------------------------------------------------------------------------------------------------------------------------------------------------------------------------------------------------------------------------------|----------------------------------------------------------------------------------------------------------------------------------------------------------------------------------------------------------------------------------------------|
| ≥ 18 years                                                                                                                                                                                                                                                                                                                                                                                                                                                                                                    | Patient is a candidate for relevant therapies that are the current standard of care for their cancer disease                                                                                                                                 |
| Patients prostatectomised (PT) due to histologically verified adenocarcinoma of the prostate gland who currently are not being treated, or expected within the next 8 months to be treated, with any anti-cancer treatment. Patients may or may not have measurable PSA.                                                                                                                                                                                                                                      | Patient has been treated with Androgen Deprivation Therapy (ADT) or expected to receive such treatment within the next 8 months from enrolment.                                                                                              |
| Able to understand the study procedures and willing to provide informed consent.                                                                                                                                                                                                                                                                                                                                                                                                                              | Concurrent chemotherapy or radiotherapy within 12 weeks of 1st vaccination, or expected to receive such treatment within the next 8 months from enrolment.                                                                                   |
| Able and willing to comply with study requirements and complete all visits.                                                                                                                                                                                                                                                                                                                                                                                                                                   | Patients have undergone major surgery or have had major bleeding within the last month prior to the first vaccination.                                                                                                                       |
| Using adequate contraceptive measures.<br>All non-vasectomized patients must use condoms during the study and for one month after the last vaccination with RV001V, or have a female partner who either has been post-menopausal for more than one year or is using a highly effective method of contraception (i.e., a method with less than 1% failure rate).                                                                                                                                               | Patients with brain or leptomeningeal metastasis.                                                                                                                                                                                            |
| Eastern Cooperative Oncology Group (ECOG) status 0 or 1.                                                                                                                                                                                                                                                                                                                                                                                                                                                      | Prior treatment with any therapeutic anti-cancer vaccine(s).                                                                                                                                                                                 |
| Recovered/stabilized at grade ≤2 from all toxicities related to prior treatment(s) in accordance with Common Terminology Criteria for Adverse Events (CTCAE)                                                                                                                                                                                                                                                                                                                                                  | History of second malignancy (except for adequately managed basal cell carcinoma and squamous cell carcinoma of the skin).                                                                                                                   |
| Laboratory values obtained ≤30 days prior to the first vaccination, and more than 3 weeks after potential chemotherapy <ul style="list-style-type: none"> <li>• Haemoglobin ≥5.6 mmol/L</li> <li>• Absolute granulocyte count ≥1.5 x 10<sup>9</sup> /L</li> <li>• Platelets ≥100 x 10<sup>9</sup> /L</li> <li>• Total bilirubin ≤1.5 x upper limit of normal (ULN)</li> <li>• Creatinine ≤1.5 x ULN</li> <li>• Alanine aminotransferase/aspartate aminotransferase/ alkaline phosphatase ≤2.5 xULN</li> </ul> | Patients in need of or treated the last 30 days before the first vaccination with systemic steroids or other immune suppressive therapy. Use of inhaled steroids, nasal sprays, and topical creams for small body areas is allowed.          |
|                                                                                                                                                                                                                                                                                                                                                                                                                                                                                                               | History of alcohol or substance abuse within the last 5 years.                                                                                                                                                                               |
|                                                                                                                                                                                                                                                                                                                                                                                                                                                                                                               | History of acquired immune deficiency syndrome or positive serological test for human immunodeficiency virus infection.                                                                                                                      |
|                                                                                                                                                                                                                                                                                                                                                                                                                                                                                                               | History of acquired immune deficiency syndrome or positive serological test for human immunodeficiency virus infection.                                                                                                                      |
|                                                                                                                                                                                                                                                                                                                                                                                                                                                                                                               | History of viral hepatitis B as determined by positive antibody immunoglobulin M (IgM) to core antigen for hepatitis B or positive for hepatitis B surface antigen, or viral hepatitis C as determined by positive antibody for hepatitis C. |

S1

|  |                                                                                                                                                                                                                                                                                  |
|--|----------------------------------------------------------------------------------------------------------------------------------------------------------------------------------------------------------------------------------------------------------------------------------|
|  | Participation in any investigational trial or use of any investigational drug(s) within 30 days prior to inclusion in this trial.                                                                                                                                                |
|  | Any known serious infections, e.g. tuberculosis                                                                                                                                                                                                                                  |
|  | History of significant autoimmune disease such as: Inflammatory bowel disease, Systemic lupus erythematosus, Ankylosing spondylitis, Scleroderma, Multiple sclerosis.                                                                                                            |
|  | Severe medical conditions, such as but not limited to severe asthma/chronic obstructive pulmonary disease (COPD), New York Heart Association (NYHA) grading 3 or above, poorly regulated insulin-dependent diabetes, any significant organ damage as judged by the Investigator. |
|  | Other medications or conditions that in the Investigator's opinion would contraindicate study participation for safety reasons or interfere with the interpretation of study results.                                                                                            |
|  | History of drug allergies or known allergy/hypersensitivity to Montanide ISA 51, or intolerance to subcutaneous injection.                                                                                                                                                       |

Supplementary table S2: Patient's characteristics

| PATIENT | AGE | WEIGHT [kg]        |                                       | PSA LEVEL [ $\mu\text{g/L}$ ] |                                     |                                       |                                               |
|---------|-----|--------------------|---------------------------------------|-------------------------------|-------------------------------------|---------------------------------------|-----------------------------------------------|
|         |     | Baseline (visit 1) | 13 months post-vaccination (visit 17) | Baseline (visit 1)            | 4 weeks post-vaccination (visit 13) | 13 months post-vaccination (visit 17) | Last PSA measurement (months** from visit 13) |
| 001     | 64  | 91,5               | 83                                    | $\leq 0,10$                   | $\leq 0,10$                         | $\leq 0,10$                           | $\leq 0,10$ (24,0)                            |
| 002     | 74  | 93                 | 92                                    | $\leq 0,10$                   | $\leq 0,10$                         | $\leq 0,10$                           | $\leq 0,10$ (23,6)                            |
| 003     | 69  | 87                 | 87                                    | $\leq 0,10$                   | $\leq 0,10$                         | $\leq 0,10$                           | $\leq 0,10$ (24,0)                            |
| 004     | 76  | 100                | 100                                   | $\leq 0,10$                   | $\leq 0,10$                         | $\leq 0,10$                           | $\leq 0,10$ (22,4)                            |
| 005     | 65  | 104                | 108                                   | $\leq 0,10$                   | $\leq 0,10$                         | $\leq 0,10$                           | $\leq 0,10$ (21,2)                            |
| 006     | 71  | 112                | 112                                   | 0,50                          | 0,60                                | 0,80                                  | 1,0 (22,5)                                    |
| 007     | 62  | 100                | 101                                   | $\leq 0,10$                   | $\leq 0,10$                         | $\leq 0,10$                           | $\leq 0,10$ (23,2)                            |
| 009     | 65  | 88,5               | 87                                    | $\leq 0,10$                   | $\leq 0,10$                         | $\leq 0,10$                           | $\leq 0,10$ (22,2)                            |
| 010     | 68  | 79                 | 89                                    | $\leq 0,10$                   | $\leq 0,10$                         | $\leq 0,10$                           | $\leq 0,10$ (19,9)                            |
| 011     | 68  | 110,5              | 101                                   | $\leq 0,10$                   | $\leq 0,10$                         | $\leq 0,10$                           | $\leq 0,10$ (22,2)                            |
| 012     | 74  | 82                 | 80                                    | $\leq 0,10$                   | $\leq 0,10$                         | $\leq 0,10$                           | $\leq 0,10$ (22,4)                            |
| 013     | 65  | 93                 | 90                                    | $\leq 0,10$                   | $\leq 0,10$                         | $\leq 0,10$                           | $\leq 0,10$ (21,9)                            |
| 015*    | 73  | 95,5               | 93                                    | $\leq 0,10$                   | $\leq 0,10$                         | 0,20                                  | 0,28 (25,4)                                   |
| 016     | 69  | 98,5               | 93                                    | $\leq 0,10$                   | $\leq 0,10$                         | $\leq 0,10$                           | $\leq 0,10$ (21,5)                            |
| 017     | 71  | 75                 | 75                                    | $\leq 0,10$                   | $\leq 0,10$                         | $\leq 0,10$                           | $\leq 0,10$ (21,5)                            |
| 018     | 77  | 90                 | 96                                    | 1,10                          | 1,10                                | 1,30                                  | 1,30 (21,7)                                   |
| 019     | 70  | 72,5               | 73                                    | $\leq 0,10$                   | $\leq 0,10$                         | $\leq 0,10$                           | $\leq 0,10$ (21,8)                            |
| 020     | 55  | 110                | 109                                   | $\leq 0,10$                   | $\leq 0,10$                         | $\leq 0,10$                           | $\leq 0,10$ (21,5)                            |
| 021     | 72  | 96,5               | 97                                    | $\leq 0,10$                   | $\leq 0,10$                         | $\leq 0,10$                           | $\leq 0,10$ (20,6)                            |
| 022     | 54  | 83,5               | 91                                    | $\leq 0,10$                   | $\leq 0,10$                         | $\leq 0,10$                           | $\leq 0,10$ (20,9)                            |
| 023     | 60  | 126                | 131                                   | $\leq 0,10$                   | $\leq 0,10$                         | $\leq 0,10$                           | $\leq 0,10$ (20,5)                            |
| 024     | 66  | 84,5               | 81                                    | $\leq 0,10$                   | $\leq 0,10$                         | $\leq 0,10$                           | $\leq 0,10$ (21)                              |

\*Patient received only seven vaccinations instead of 11.

\*\* Assumption 30 days per months.

Supplementary table S3: HLA-typing of individual patients and cell lines

| PATIENT/<br>CELL<br>LINE | HLA-<br>A (1) | HLA-<br>A (2) | HLA-<br>B (1) | HLA-<br>B (2) | HLA-<br>C (1) | HLA-<br>C (2) | HLA-<br>DRB1<br>(1) | HLA-<br>DRB1<br>(2) | HLA-<br>DQB1<br>(1) | HLA-<br>DQB1<br>(2) | HLA-<br>DPB1<br>(1) | HLA-<br>DPB1<br>(2) |
|--------------------------|---------------|---------------|---------------|---------------|---------------|---------------|---------------------|---------------------|---------------------|---------------------|---------------------|---------------------|
| <b>001</b>               | 01:01         | 02:01         | 08:01         | 40:01         | 03:04P        | 07:01P        | 03:01               | 13:02               | 02:01               | 06:04               | 01:01               | 04:02               |
| <b>002</b>               | 29:01         | 68:01         | 07:05         | 50:01         | 06:02         | 15:05         | 07:01P              | 10:01               | 02:02P              | 05:01               | 02:01               | 13:01               |
| <b>003</b>               | 01:01         | 11:01         | 08:01         | 40:01         | 03:04P        | 07:01P        | 03:01               | 13:02               | 02:01               | 06:04               | 04:01               | 04:01               |
| <b>004</b>               | 02:01         | 30:02         | 18:01         | 27:05         | 01:02         | 05:01         | 01:01               | 03:01               | 02:01               | 05:01               | 04:01               | 04:01               |
| <b>005</b>               | 02:01         | na            | 07:02         | 51:01         | 02:02         | 07:02         | 04:04               | 11:01               | 03:01               | 03:02P              | 04:01               | 16:01               |
| <b>006</b>               | 02:01         | na            | 08:01         | 44:02         | 05:01         | 07:01         | 01:01               | 14:54               | 05:01               | 05:03P              | 03:01P              | 04:01P              |
| <b>007</b>               | 01:01         | 68:02         | 08:01         | 14:02         | 07:01         | 08:02         | 03:01               | 13:03               | 02:01P              | 03:01P              | 01:01P              | 02:01P              |
| <b>009</b>               | 11:01         | na            | 35:01         | na            | 04:01         | na            | 01:03               | 14:54               | 05:01P              | 05:03P              | 04:01P              | 04:02P              |
| <b>010</b>               | 02:01         | na            | 08:01         | 15:01         | 03:03         | 07:01         | 03:01               | 04:01               | 02:01               | 03:02               | 01:01               | 04:01               |
| <b>011</b>               | 01:01         | 32:01         | 08:01         | 15:01         | 03:03         | 07:01         | 07:01P              | 07:01P              | 02:01P              | 02:01P              | 04:01               | 17:01               |
| <b>012</b>               | 02:01         | 68:01         | 40:01         | 44:02         | 03:04         | 07:04         | 11:01               | 12:01P              | 03:01               | 03:01               | 09:01               | 03:01P              |
| <b>013</b>               | 02:01         | 68:01         | 27:05         | 44:02         | 02:02         | 07:04         | 11:01               | 15:01               | 03:02               | 06:02               | 03:01P              | 04:01P              |
| <b>015</b>               | 02:01         | na            | 07:02         | 40:01         | 03:04         | 07:02         | 04:04               | 15:01               | 03:02               | 06:02               | 03:01               | 05:01               |
| <b>016</b>               | 24:02P        | 25:01         | 39:06         | 44:02         | 05:01         | 07:02         | 04:01               | 08:01P              | 03:02               | 04:02               | 02:01               | 04:01               |
| <b>017</b>               | 02:01         | 32:01         | 40:01         | na            | 03:04         | na            | 04:08               | 15:01               | 03:01               | 06:02               | 02:01               | 04:01               |
| <b>018</b>               | 01:01         | 02:01         | 40:01         | 51:01         | 03:04         | 15:02         | 04:04               | 13:02               | 03:02P              | 06:04P              | 04:01P              | 222:01              |
| <b>019</b>               | 03:01         | 24:02P        | 07:02         | 35:03         | 07:02         | 12:03         | 15:01               | 15:01               | 06:02               | 06:02               | 04:01               | 04:01               |
| <b>020</b>               | 02:01         | 32:01         | 07:02         | 40:02         | 02:02         | 07:02         | 15:01               | 16:02               | 05:02               | 06:02               | 04:01               | 04:01               |
| <b>021</b>               | 02:01         | 03:01         | 15:39         | 18:01         | 04:01         | 07:01         | 11:02               | 11:04               | 03:01               | 03:01               | 04:02               | 10:01               |
| <b>022</b>               | 11:01         | 31:01         | 27:05         | 44:02         | 02:02         | 05:01         | 04:01               | 12:01P              | 03:01               | 03:02P              | 03:01P              | 04:02P              |
| <b>023</b>               | 02:01         | 32:01         | 15:01         | 15:07         | 03:03         | na            | 04:04               | 04:04               | 03:02               | 03:02               | 02:01               | 04:01               |
| <b>024</b>               | 02:01         | na            | 15:01         | 51:01         | 03:04         | 15:02         | 01:01               | 04:04               | 03:02               | 05:01               | 04:01               | 04:01               |
| <b>MGAR</b>              | 26:01         | 26:01         | 08:01         | 08:01         | 07:01         | 07:01         | 15:01               | 15:01               | 06:02               | 26:02               | 04:01               | 04:01               |
| <b>H0301</b>             | 03:01         | 03:01         | 14:02         | 14:02         | 08:02         | 08:02         | 13:02               | 13:02               | 06:09               | 06:09               | 05:01               | 05:01               |

P: ambiguities; na: not available.

Supplementary table S4: IFN- $\gamma$  ELISpot raw data spot counts per analysis time and patient

| Patient  | Visit    | Antigen | R1    | R2   | R3   | R4  | R5  | R6  | Patient  | Visit    | Antigen | R1      | R2    | R3   | R4  | R5  | R6  |   |  |
|----------|----------|---------|-------|------|------|-----|-----|-----|----------|----------|---------|---------|-------|------|-----|-----|-----|---|--|
| 001      | Visit 2  | RV001   | na    | na   | na   |     |     |     | 006      | Visit 2  | RV001   | 8       | 16    | 18   |     |     |     |   |  |
|          |          | neg     | na    | na   | na   | na  | na  | na  |          |          | na      | neg     | 5     | 14   | 17  | 5   | 4   | 9 |  |
|          | Visit 6  | RV001   | 1203  | 853  | 1148 |     |     |     |          | Visit 6  | RV001   | 975     | 956   | 1102 |     |     |     |   |  |
|          |          | neg     | 44    | 71   | 55   | 29  | 28  | 32  |          |          | neg     | 12      | 15    | 12   | 15  | 15  | 20  |   |  |
|          | Visit 8  | RV001   | 1334  | 1292 | 1232 |     |     |     |          | Visit 8  | RV001   | 1026    | 807   | 882  |     |     |     |   |  |
|          |          | neg     | 0     | 2    | 0    | 4   | 2   | 1   |          |          | neg     | 54      | 56    | 68   | 67  | 39  | 45  |   |  |
|          | Visit 13 | RV001   | 1252  | 1276 | 1163 |     |     |     |          | Visit 13 | RV001   | 352     | 261   | 296  |     |     |     |   |  |
|          |          | neg     | 0     | 0    | 0    | 0   | 0   | 0   |          |          | neg     | 69      | 217   | 47   | 49  | 42  | 42  |   |  |
|          | Visit 14 | RV001   | 1260  | 1371 | 1328 |     |     |     |          | Visit 14 | RV001   | 438     | 499   | 653  |     |     |     |   |  |
|          |          | neg     | 0     | 0    | 0    | 0   | 0   | 0   |          |          | neg     | 9       | 8     | 7    | 6   | 4   | 2   |   |  |
|          | Visit 15 | RV001   | 1348  | 1341 | 1342 |     |     |     |          | Visit 15 | RV001   | 11      | 4     | 12   |     |     |     |   |  |
|          |          | neg     | 6     | 0    | 1    | 2   | 0   | 0   |          |          | neg     | 1       | 1     | 1    | 0   | 2   | 3   |   |  |
|          | Visit 16 | RV001   | 140   | 128  | 135  |     |     |     |          | Visit 16 | RV001   | 55      | 81    | 58   |     |     |     |   |  |
|          |          | neg     | 0     | 0    | 0    | 0   | 0   | 0   |          |          | neg     | 5       | 6     | 6    | 5   | 3   | 4   |   |  |
|          | Visit 17 | RV001   | 1044  | 1031 | 1013 |     |     |     |          | Visit 17 | RV001   | 220     | 213   | 226  |     |     |     |   |  |
|          |          | neg     | 0     | 0    | 0    | 0   | 0   | 0   |          |          | neg     | 29      | 47    | 37   | 31  | 32  | 28  |   |  |
|          | 003      | Visit 2 | RV001 | 189  | 118  | 171 |     |     |          |          | 007     | Visit 2 | RV001 | 59   | 69  | 67  |     |   |  |
| neg      |          |         | 137   | 115  | 145  | 137 | 131 | 142 | neg      | 41       |         |         | 43    | 27   | 40  | 27  | 33  |   |  |
| Visit 6  |          | RV001   | 1527  | 1560 | 1522 |     |     |     | Visit 6  | RV001    |         | 127     | 106   | 132  |     |     |     |   |  |
|          |          | neg     | 20    | 16   | 20   | 18  | 18  | 20  |          | neg      |         | 71      | 77    | 69   | 96  | 107 | 59  |   |  |
| Visit 8  |          | RV001   | 1345  | 1423 | 1399 |     |     |     | Visit 8  | RV001    |         | 98      | 98    | 93   |     |     |     |   |  |
|          |          | neg     | 96    | 149  | 108  | 118 | 99  | 100 |          | neg      |         | 13      | 8     | 16   | 8   | 11  | 15  |   |  |
| Visit 13 |          | RV001   | 1477  | 1416 | 1627 |     |     |     | Visit 13 | RV001    |         | 100     | 94    | 97   |     |     |     |   |  |
|          |          | neg     | 22    | 33   | 40   | 32  | 19  | 35  |          | neg      |         | 14      | 23    | 14   | 17  | 5   | 16  |   |  |
| Visit 14 |          | RV001   | 2000  | 2000 | 2000 |     |     |     | Visit 14 | RV001    |         | 27      | 33    | 37   |     |     |     |   |  |
|          |          | neg     | 3     | 2    | 4    | 3   | 2   | 0   |          | neg      |         | 6       | 5     | 6    | 3   | 12  | 5   |   |  |
| Visit 15 |          | RV001   | 1571  | 1665 | 1605 |     |     |     | Visit 15 | RV001    |         | 415     | 500   | 433  |     |     |     |   |  |
|          |          | neg     | 23    | 25   | 25   | 14  | 15  | 20  |          | neg      |         | 21      | 33    | 27   | 24  | 22  | 28  |   |  |
| Visit 16 |          | RV001   | 1080  | 1064 | 1040 |     |     |     | Visit 16 | RV001    |         | 188     | 216   | 208  |     |     |     |   |  |
|          |          | neg     | 0     | 0    | 0    | 0   | 0   | 0   |          | neg      |         | 36      | 21    | 27   | 33  | 34  | 23  |   |  |
| Visit 17 |          | RV001   | 2000  | 2000 | 2000 |     |     |     | Visit 17 | RV001    |         | 307     | 312   | 269  |     |     |     |   |  |
|          |          | neg     | 138   | 106  | 127  | 82  | 99  | 104 |          | neg      |         | 155     | 131   | 159  | 179 | 158 | 154 |   |  |
| 004      |          | Visit 2 | RV001 | 54   | 11   | 22  |     |     |          | 009      |         | Visit 2 | RV001 | 13   | 1   | 9   |     |   |  |
|          | neg      |         | 11    | 18   | 7    | 12  | 40  | 43  | neg      |          | 3       |         | 1     | 7    | 7   | 9   | 7   |   |  |
|          | Visit 6  | RV001   | 105   | 93   | 117  |     |     |     | Visit 6  |          | RV001   | 335     | 399   | 152  |     |     |     |   |  |
|          |          | neg     | 391   | 39   | 433  | 40  | 56  | 28  |          |          | neg     | 5       | 12    | 8    | 8   | 6   | 12  |   |  |
|          | Visit 8  | RV001   | 1133  | 1088 | 1104 |     |     |     | Visit 8  |          | RV001   | 1208    | 1065  | 1081 |     |     |     |   |  |
|          |          | neg     | 28    | 4    | 9    | 9   | 5   | 3   |          |          | neg     | 27      | 26    | 19   | 16  | 17  | 19  |   |  |
|          | Visit 13 | RV001   | 1194  | 1091 | 1140 |     |     |     | Visit 13 |          | RV001   | 1567    | 1592  | 1538 |     |     |     |   |  |
|          |          | neg     | 28    | 49   | 25   | 22  | 24  | 41  |          |          | neg     | 46      | 183   | 141  | 53  | 43  | 43  |   |  |
|          | Visit 14 | RV001   | 375   | 400  | 306  |     |     |     | Visit 14 |          | RV001   | 1094    | 1162  | 1279 |     |     |     |   |  |
|          |          | neg     | 33    | 35   | 21   | 19  | 20  | 27  |          |          | neg     | 4       | 1     | 1    | 0   | 0   | 4   |   |  |
|          | Visit 15 | RV001   | 382   | 379  | 343  |     |     |     | Visit 15 |          | RV001   | 1258    | 1206  | 1046 |     |     |     |   |  |
|          |          | neg     | 5     | 4    | 4    | 0   | 2   | 2   |          |          | neg     | 1       | 0     | 0    | 1   | 1   | 1   |   |  |
|          | Visit 16 | RV001   | 449   | 225  | 326  |     |     |     | Visit 16 |          | RV001   | 1324    | 1347  | 1263 |     |     |     |   |  |
|          |          | neg     | 6     | 0    | 0    | 1   | 2   | 2   |          |          | neg     | 6       | 2     | 5    | 3   | 1   | 0   |   |  |
|          | Visit 17 | RV001   | 883   | 884  | 807  |     |     |     | Visit 17 |          | RV001   | 805     | 827   | 874  |     |     |     |   |  |
|          |          | neg     | 13    | 6    | 9    | 5   | 10  | 6   |          |          | neg     | 2       | 1     | 3    | 4   | 3   | 5   |   |  |
|          | 005      | Visit 2 | RV001 | 8    | 3    | 3   |     |     |          |          | 010     | Visit 2 | RV001 | 31   | 19  | 17  |     |   |  |
| neg      |          |         | 4     | 2    | 4    | 3   | 4   | 2   | neg      | 23       |         |         | 22    | 25   | 34  | 19  | 24  |   |  |
| Visit 6  |          | RV001   | 894   | 836  | 962  |     |     |     | Visit 6  | RV001    |         | 82      | 84    | 96   |     |     |     |   |  |
|          |          | neg     | 17    | 13   | 5    | 26  | 11  | 16  |          | neg      |         | 74      | 65    | 58   | 85  | 76  | 77  |   |  |
| Visit 8  |          | RV001   | 991   | 1002 | 1516 |     |     |     | Visit 8  | RV001    |         | 71      | 61    | 96   |     |     |     |   |  |
|          |          | neg     | 12    | 7    | 9    | 9   | 15  | 13  |          | neg      |         | 74      | 72    | 73   | 52  | 79  | 45  |   |  |
| Visit 13 |          | RV001   | 1495  | 1439 | 1482 |     |     |     | Visit 13 | RV001    |         | 53      | 59    | 38   |     |     |     |   |  |
|          |          | neg     | 1     | 5    | 3    | 5   | 4   | 11  |          | neg      |         | 26      | 35    | 21   | 9   | 24  | 15  |   |  |
| Visit 14 |          | RV001   | 1408  | 1388 | 1317 |     |     |     | Visit 14 | RV001    |         | 170     | 130   | 128  |     |     |     |   |  |
|          |          | neg     | 0     | 0    | 0    | 0   | 0   | 0   |          | neg      |         | 134     | 101   | 90   | 76  | 82  | 81  |   |  |
| Visit 15 |          | RV001   | 1104  | 1100 | 1125 |     |     |     | Visit 15 | RV001    |         | 98      | 100   | 103  |     |     |     |   |  |
|          |          | neg     | 0     | 0    | 2    | 2   | 0   | 0   |          | neg      |         | 17      | 16    | 17   | 14  | 20  | 22  |   |  |
| Visit 16 |          | RV001   | 1444  | 1413 | 1424 |     |     |     | Visit 16 | RV001    |         | 101     | 143   | 112  |     |     |     |   |  |
|          |          | neg     | 0     | 1    | 1    | 3   | 2   | 2   |          | neg      |         | 2       | 7     | 5    | 5   | 2   | 2   |   |  |
| Visit 17 |          | RV001   | 1456  | 1432 | 1436 |     |     |     | Visit 17 | RV001    |         | 496     | 457   | 450  |     |     |     |   |  |
|          |          | neg     | 0     | 3    | 3    | 2   | 1   | 2   |          | neg      |         | 5       | 2     | 3    | 4   | 1   | 0   |   |  |

| Patient  | Visit    | Antigen | R1   | R2   | R3   | R4  | R5       | R6       | Patient  | Visit    | Antigen | R1   | R2   | R3  | R4  | R5 | R6  |  |
|----------|----------|---------|------|------|------|-----|----------|----------|----------|----------|---------|------|------|-----|-----|----|-----|--|
| 011      | Visit 2  | RV001   | 25   | 40   | 47   |     |          |          | 016      | Visit 2  | RV001   | 33   | 31   | 39  |     |    |     |  |
|          |          | neg     | 34   | 28   | 37   | 39  | 34       | 39       |          |          | neg     | 11   | 18   | 31  | 20  | 21 | 21  |  |
|          | Visit 6  | RV001   | 955  | 1028 | 1016 |     |          |          |          | Visit 6  | RV001   | 133  | 113  | 111 |     |    |     |  |
|          |          | neg     | 89   | 98   | 112  | 127 | 101      | 102      |          |          | neg     | 15   | 23   | 22  | 21  | 20 | 36  |  |
|          | Visit 8  | RV001   | 1357 | 1342 | 1374 |     |          |          |          | Visit 8  | RV001   | 408  | 371  | 328 |     |    |     |  |
|          |          | neg     | 24   | 13   | 16   | 15  | 20       | 22       |          |          | neg     | 58   | 57   | 38  | 79  | 76 | 55  |  |
|          | Visit 13 | RV001   | 1325 | 1368 | 1313 |     |          |          |          | Visit 13 | RV001   | 257  | 269  | 346 |     |    |     |  |
|          |          | neg     | 22   | 46   | 20   | 9   | 14       | 18       |          |          | neg     | 22   | 15   | 9   | 9   | 16 | 8   |  |
|          | Visit 14 | RV001   | 1551 | 1539 | 1556 |     |          |          |          | Visit 14 | RV001   | 361  | 436  | 374 |     |    |     |  |
|          |          | neg     | 32   | 33   | 48   | 21  | 27       | 37       |          |          | neg     | 53   | 68   | 52  | 78  | 50 | 54  |  |
|          | Visit 15 | RV001   | 1737 | 1724 | 1736 |     |          |          |          | Visit 15 | RV001   | 673  | 739  | 761 |     |    |     |  |
|          |          | neg     | 10   | 16   | 11   | 6   | 10       | 8        |          |          | neg     | 3    | 2    | 0   | 1   | 1  | 2   |  |
|          | Visit 16 | RV001   | 1279 | 1228 | 1272 |     |          |          |          | Visit 16 | RV001   | 24   | 35   | 19  |     |    |     |  |
|          |          | neg     | 6    | 7    | 5    | 2   | 1        | 3        |          |          | neg     | 3    | 4    | 2   | 5   | 3  | 2   |  |
| Visit 17 | RV001    | 1244    | 1229 | 1360 |      |     |          | Visit 17 | RV001    | 13       | 12      | 15   |      |     |     |    |     |  |
|          | neg      | 2       | 5    | 5    | 4    | 2   | 3        |          | neg      | 2        | 0       | 0    | 0    | 0   | 1   |    |     |  |
| 012      | Visit 2  | RV001   | 132  | 113  | 97   |     |          | 017      | Visit 2  | RV001    | 3       | 2    | 5    |     |     |    |     |  |
|          |          | neg     | 7    | 8    | 6    | 7   | 5        |          |          | 6        | neg     | 3    | 2    | 1   | 1   | 1  | 3   |  |
|          | Visit 6  | RV001   | 715  | 699  | 875  |     |          |          | Visit 6  | RV001    | 8       | 6    | 14   |     |     |    |     |  |
|          |          | neg     | 11   | 8    | 11   | 9   | 6        |          |          | 7        | neg     | 8    | 4    | 2   | 2   | 13 | 3   |  |
|          | Visit 8  | RV001   | 1674 | 1676 | 1680 |     |          |          | Visit 8  | RV001    | 27      | 14   | 17   |     |     |    |     |  |
|          |          | neg     | 4    | 14   | 26   | 19  | 5        |          |          | 11       | neg     | 3    | 4    | 1   | 6   | 2  | 2   |  |
|          | Visit 13 | RV001   | 2000 | 2000 | 2000 |     |          |          | Visit 13 | RV001    | 113     | 88   | 57   |     |     |    |     |  |
|          |          | neg     | 7    | 11   | 2    | 12  | 6        |          |          | 7        | neg     | 0    | 0    | 0   | 3   | 3  | 1   |  |
|          | Visit 14 | RV001   | 2000 | 2000 | 2000 |     |          |          | Visit 14 | RV001    | 146     | 134  | 159  |     |     |    |     |  |
|          |          | neg     | 14   | 15   | 13   | 20  | 12       |          |          | 12       | neg     | 19   | 28   | 18  | 18  | 19 | 17  |  |
|          | Visit 15 | RV001   | 1167 | 1214 | 1315 |     |          |          | Visit 15 | RV001    | 603     | 545  | 562  |     |     |    |     |  |
|          |          | neg     | 1    | 0    | 0    | 0   | 0        |          |          | 1        | neg     | 22   | 14   | 15  | 5   | 6  | 6   |  |
|          | Visit 16 | RV001   | 222  | 283  | 323  |     |          |          | Visit 16 | RV001    | 23      | 29   | 35   |     |     |    |     |  |
|          |          | neg     | 2    | 0    | 1    | 2   | 0        |          |          | 1        | neg     | 0    | 0    | 1   | 2   | 2  | 0   |  |
| Visit 17 | RV001    | 1228    | 1166 | 1176 |      |     | Visit 17 | RV001    | 38       | 36       | 45      |      |      |     |     |    |     |  |
|          | neg      | 0       | 0    | 0    | 0    | 1   |          | 0        | neg      | 4        | 5       | 2    | 3    | 1   | 2   |    |     |  |
| 013      | Visit 2  | RV001   | 9    | 13   | 8    |     |          | 018      | Visit 2  | RV001    | 19      | 39   | 27   |     |     |    |     |  |
|          |          | neg     | 13   | 9    | 14   | 12  | 14       |          |          | 7        | neg     | 28   | 17   | 20  | 18  | 20 | 26  |  |
|          | Visit 6  | RV001   | 1226 | 1218 | 1243 |     |          |          | Visit 6  | RV001    | 1061    | 1091 | 1096 |     |     |    |     |  |
|          |          | neg     | 13   | 12   | 8    | 11  | 7        |          |          | 7        | neg     | 86   | 124  | 106 | 107 | 83 | 103 |  |
|          | Visit 8  | RV001   | 1534 | 1543 | 1532 |     |          |          | Visit 8  | RV001    | 832     | 829  | 799  |     |     |    |     |  |
|          |          | neg     | 14   | 6    | 5    | 9   | 8        |          |          | 7        | neg     | 16   | 17   | 19  | 21  | 13 | 21  |  |
|          | Visit 13 | RV001   | 1639 | 1635 | 1618 |     |          |          | Visit 13 | RV001    | 1272    | 1295 | 1308 |     |     |    |     |  |
|          |          | neg     | 17   | 4    | 6    | 11  | 12       |          |          | 7        | neg     | 36   | 34   | 25  | 54  | 24 | 34  |  |
|          | Visit 14 | RV001   | 1505 | 1502 | 1603 |     |          |          | Visit 14 | RV001    | 1154    | 1187 | 1255 |     |     |    |     |  |
|          |          | neg     | 14   | 15   | 23   | 2   | 16       |          |          | 11       | neg     | 2    | 4    | 4   | 5   | 5  | 5   |  |
|          | Visit 15 | RV001   | 1583 | 1519 | 1469 |     |          |          | Visit 15 | RV001    | 1363    | 1353 | 1308 |     |     |    |     |  |
|          |          | neg     | 16   | 14   | 17   | 8   | 7        |          |          | 8        | neg     | 8    | 17   | 22  | 9   | 11 | 11  |  |
|          | Visit 16 | RV001   | 2000 | 2000 | 2000 |     |          |          | Visit 16 | RV001    | 1242    | 1215 | 1272 |     |     |    |     |  |
|          |          | neg     | 6    | 5    | 5    | 3   | 4        |          |          | 6        | neg     | 36   | 45   | 41  | 35  | 29 | 32  |  |
| Visit 17 | RV001    | 2000    | 2000 | 2000 |      |     | Visit 17 | RV001    | 1221     | 1203     | 1206    |      |      |     |     |    |     |  |
|          | neg      | 3       | 7    | 2    | 6    | 4   |          | 1        | neg      | 17       | 19      | 14   | 12   | 16  | 8   |    |     |  |
| 015      | Visit 2  | RV001   | 4    | 2    | 3    |     |          | 019      | Visit 2  | RV001    | 13      | 17   | 10   |     |     |    |     |  |
|          |          | neg     | 4    | 1    | 4    | 2   | 6        |          |          | 1        | neg     | 11   | 4    | 1   | 3   | 7  | 16  |  |
|          | Visit 6  | RV001   | 8    | 3    | 7    |     |          |          | Visit 6  | RV001    | 374     | 510  | 399  |     |     |    |     |  |
|          |          | neg     | 52   | 2    | 1    | 1   | 0        |          |          | 4        | neg     | 3    | 3    | 3   | 4   | 4  | 3   |  |
|          | Visit 8  | RV001   | 427  | 440  | 362  |     |          |          | Visit 8  | RV001    | 1324    | 1029 | 990  |     |     |    |     |  |
|          |          | neg     | 49   | 24   | 23   | 24  | 31       |          |          | 26       | neg     | 6    | 12   | 8   | 7   | 2  | 291 |  |
|          | Visit 13 | RV001   | na   | na   | na   |     |          |          | Visit 13 | RV001    | 1199    | 1114 | 1246 |     |     |    |     |  |
|          |          | neg     | na   | na   | na   | na  | na       |          |          | na       | neg     | 6    | 3    | 7   | 0   | 10 | 6   |  |
|          | Visit 14 | RV001   | 962  | 873  | 864  |     |          |          | Visit 14 | RV001    | 52      | 53   | 81   |     |     |    |     |  |
|          |          | neg     | 11   | 4    | 15   | 4   | 4        |          |          | 4        | neg     | 0    | 0    | 0   | 0   | 1  | 0   |  |
|          | Visit 15 | RV001   | 1381 | 1413 | 1657 |     |          |          | Visit 15 | RV001    | 940     | 939  | 999  |     |     |    |     |  |
|          |          | neg     | 4    | 2    | 2    | 1   | 4        |          |          | 1        | neg     | 0    | 1    | 1   | 0   | 0  | 0   |  |
|          | Visit 16 | RV001   | 1121 | 1164 | 1121 |     |          |          | Visit 16 | RV001    | 123     | 251  | 90   |     |     |    |     |  |
|          |          | neg     | 5    | 1    | 4    | 8   | 5        |          |          | 4        | neg     | 0    | 0    | 0   | 0   | 0  | 0   |  |
| Visit 17 | RV001    | 1126    | 1178 | 1073 |      |     | Visit 17 | RV001    | 78       | 26       | 44      |      |      |     |     |    |     |  |
|          | neg      | 45      | 33   | 24   | 59   | 36  |          | 55       | neg      | 0        | 0       | 0    | 0    | 0   | 0   |    |     |  |

| Patient  | Visit    | Antigen | R1   | R2   | R3   | R4  | R5  | R6       | Patient | Visit    | Antigen | R1  | R2  | R3   | R4  | R5  | R6  |  |
|----------|----------|---------|------|------|------|-----|-----|----------|---------|----------|---------|-----|-----|------|-----|-----|-----|--|
| 020      | Visit 2  | RV001   | 72   | 25   | 48   |     |     |          | 024     | Visit 2  | RV001   | 0   | 0   | 0    |     |     |     |  |
|          |          | neg     | 29   | 42   | 71   | 68  | 67  | 53       |         |          | neg     | 0   | 0   | 1    | 0   | 0   | 0   |  |
|          | Visit 6  | RV001   | 167  | 117  | 166  |     |     |          |         | Visit 6  | RV001   | 21  | 20  | 24   |     |     |     |  |
|          |          | neg     | 93   | 126  | 171  | 171 | 172 | 125      |         |          | neg     | 24  | 16  | 20   | 13  | 34  | 19  |  |
|          | Visit 8  | RV001   | 465  | 575  | 557  |     |     |          |         | Visit 8  | RV001   | 5   | 5   | 6    |     |     |     |  |
|          |          | neg     | 107  | 62   | 86   | 24  | 49  | 58       |         |          | neg     | 7   | 5   | 13   | 5   | 8   | 14  |  |
|          | Visit 13 | RV001   | 1194 | 1115 | 1176 |     |     |          |         | Visit 13 | RV001   | 3   | 2   | 8    |     |     |     |  |
|          |          | neg     | 132  | 102  | 141  | 80  | 82  | 115      |         |          | neg     | 5   | 4   | 5    | 1   | 3   | 2   |  |
|          | Visit 14 | RV001   | 1391 | 1423 | 1538 |     |     |          |         | Visit 14 | RV001   | 1   | 2   | 3    |     |     |     |  |
|          |          | neg     | 0    | 0    | 0    | 0   | 0   | 1        |         |          | neg     | 2   | 0   | 1    | 2   | 4   | 3   |  |
|          | Visit 15 | RV001   | 1551 | 1369 | 1445 |     |     |          |         | Visit 15 | RV001   | 9   | 3   | 4    |     |     |     |  |
|          |          | neg     | 1    | 1    | 2    | 1   | 1   | 2        |         |          | neg     | 6   | 5   | 7    | 5   | 16  | 5   |  |
|          | Visit 16 | RV001   | 826  | 804  | 788  |     |     |          |         | Visit 16 | RV001   | 2   | 3   | 5    |     |     |     |  |
|          |          | neg     | 3    | 1    | 0    | 1   | 0   | 1        |         |          | neg     | 5   | 4   | 2    | 9   | 6   | 2   |  |
| Visit 17 | RV001    | 2000    | 2000 | 2000 |      |     |     | Visit 17 | RV001   | 9        | 3       | 5   |     |      |     |     |     |  |
|          | neg      | 2       | 1    | 0    | 4    | 3   | 1   |          | neg     | 11       | 11      | 8   | 9   | 9    | 8   |     |     |  |
| 021      | Visit 2  | RV001   | 3    | 3    | 4    |     |     |          | 022     | Visit 2  | RV001   | 15  | 14  | 4    |     |     |     |  |
|          |          | neg     | 0    | 1    | 1    | 1   | 1   | 1        |         |          | neg     | 9   | 2   | 8    | 12  | 9   | 7   |  |
|          | Visit 6  | RV001   | 17   | 24   | 17   |     |     |          |         | Visit 6  | RV001   | 961 | 966 | 1017 |     |     |     |  |
|          |          | neg     | 12   | 12   | 7    | 17  | 12  | 12       |         |          | neg     | 18  | 14  | 14   | 27  | 18  | 21  |  |
|          | Visit 8  | RV001   | 488  | 539  | 496  |     |     |          |         | Visit 8  | RV001   | 335 | 334 | 320  |     |     |     |  |
|          |          | neg     | 3    | 1    | 2    | 0   | 1   | 2        |         |          | neg     | 42  | 57  | 44   | 35  | 28  | 41  |  |
|          | Visit 13 | RV001   | 1292 | 1298 | 1321 |     |     |          |         | Visit 13 | RV001   | 945 | 878 | 805  |     |     |     |  |
|          |          | neg     | 0    | 0    | 1    | 1   | 2   | 0        |         |          | neg     | 83  | 100 | 107  | 112 | 106 | 76  |  |
|          | Visit 14 | RV001   | 1425 | 1442 | 1397 |     |     |          |         | Visit 14 | RV001   | 946 | 925 | 963  |     |     |     |  |
|          |          | neg     | 5    | 1    | 6    | 3   | 6   | 2        |         |          | neg     | 7   | 16  | 3    | 8   | 3   | 6   |  |
|          | Visit 15 | RV001   | 1465 | 1602 | 1497 |     |     |          |         | Visit 15 | RV001   | 623 | 642 | 649  |     |     |     |  |
|          |          | neg     | 2    | 0    | 1    | 2   | 2   | 3        |         |          | neg     | 3   | 5   | 0    | 0   | 1   | 3   |  |
|          | Visit 16 | RV001   | 1321 | 1325 | 1377 |     |     |          |         | Visit 16 | RV001   | 424 | 406 | 461  |     |     |     |  |
|          |          | neg     | 2    | 2    | 2    | 3   | 2   | 2        |         |          | neg     | 77  | 96  | 106  | 66  | 63  | 94  |  |
| Visit 17 | RV001    | 1428    | 1414 | 1435 |      |     |     | Visit 17 | RV001   | 480      | 421     | 432 |     |      |     |     |     |  |
|          | neg      | 2       | 4    | 5    | 2    | 4   | 3   |          | neg     | 3        | 6       | 5   | 4   | 2    | 5   |     |     |  |
| 023      | Visit 2  | RV001   | 358  | 433  | 475  |     |     |          | 023     | Visit 2  | RV001   | 16  | 19  | 16   |     |     |     |  |
|          |          | neg     | 293  | 288  | 314  | 218 | 267 | 323      |         |          | neg     | 13  | 14  | 8    | 11  | 12  | 9   |  |
|          | Visit 6  | RV001   | 39   | 35   | 26   |     |     |          |         | Visit 6  | RV001   | 39  | 35  | 26   |     |     |     |  |
|          |          | neg     | 26   | 28   | 21   | 17  | 23  | 21       |         |          | neg     | 26  | 28  | 21   | 17  | 23  | 21  |  |
|          | Visit 8  | RV001   | 287  | 160  | 209  |     |     |          |         | Visit 8  | RV001   | 287 | 160 | 209  |     |     |     |  |
|          |          | neg     | 222  | 228  | 191  | 149 | 122 | 137      |         |          | neg     | 222 | 228 | 191  | 149 | 122 | 137 |  |
|          | Visit 13 | RV001   | 3    | 1    | 0    |     |     |          |         | Visit 13 | RV001   | 3   | 1   | 0    |     |     |     |  |
|          |          | neg     | 0    | 2    | 1    | 1   | 2   | 1        |         |          | neg     | 0   | 2   | 1    | 1   | 2   | 1   |  |
|          | Visit 14 | RV001   | 39   | 38   | 51   |     |     |          |         | Visit 14 | RV001   | 39  | 38  | 51   |     |     |     |  |
|          |          | neg     | 44   | 64   | 51   | 76  | 59  | 49       |         |          | neg     | 44  | 64  | 51   | 76  | 59  | 49  |  |
|          | Visit 15 | RV001   | 24   | 28   | 44   |     |     |          |         | Visit 15 | RV001   | 24  | 28  | 44   |     |     |     |  |
|          |          | neg     | 20   | 25   | 38   | 39  | 48  | 27       |         |          | neg     | 20  | 25  | 38   | 39  | 48  | 27  |  |
|          | Visit 16 | RV001   | 29   | 24   | 38   |     |     |          |         | Visit 16 | RV001   | 29  | 24  | 38   |     |     |     |  |
|          |          | neg     | 26   | 16   | 33   | 21  | 22  | 19       |         |          | neg     | 26  | 16  | 33   | 21  | 22  | 19  |  |

R: Replicate; neg = negative control (ddH<sub>2</sub>O); na= not available. For all patients and tests, 0.2 x 10<sup>6</sup> cells were plated/ well, except for Patient 021 visit 2 to visit 13 and Patient 012 visits 16 and 17, here 0.17 x 10<sup>6</sup> cells were plated/ well. Patient 002 dropped out of the immunological analysis due to inconsistent results (data not shown). Visit 2 for Patient 001 and visit 13 for Patient 015 were not tested as no PBMC samples were available. Spots counts above 2000/well or TNTC (too numerous to count) are set to 2000 and marked in red. For details on the ELISpot, see Material and Methods.

Supplementary table S5: Monoclonal antibody panels for flow cytometry analysis

|                        |                        | Marker                 | Fluorophore   | Clone       | Manufacturer | Cat. No.   |
|------------------------|------------------------|------------------------|---------------|-------------|--------------|------------|
| Panel 1                | Extracellular staining | LD                     | Zombie Aqua   | -           | BioLegend    | 423102     |
|                        |                        | CD4                    | APC-Cy7       | RPA-T4      | BD           | 557871     |
|                        |                        | CD8                    | BV605         | RPA-T8      | BioLegend    | 301040     |
|                        |                        | CD107a                 | FITC          | H4A3        | BD           | 555800     |
|                        | Intracellular staining | TNF                    | Pacific Blue  | MAB11       | BioLegend    | 502920     |
|                        |                        | IFN- $\gamma$          | PE-Cy7        | 4S.B3       | BD           | 557844     |
|                        |                        | IL-2                   | PE            | MQ1-17H12   | BD           | 554566     |
| CD154                  |                        | APC                    | 24-31         | BioLegend   | 310810       |            |
| Panel 2                | Extracellular staining | LD                     | Zombie Aqua   | -           | BioLegend    | 423102     |
|                        |                        | CD4                    | APC-Cy7       | RPA-T4      | BD           | 557871     |
|                        |                        | CD8                    | AF700         | SK1         | BioLegend    | 344723     |
|                        |                        | CD107a                 | FITC          | H4A3        | BD           | 555800     |
|                        |                        | CD45RA                 | BV711         | HI100       | BioLegend    | 304138     |
|                        |                        | CCR7                   | BV605         | G043H7      | BioLegend    | 353224     |
|                        |                        | LAG-3                  | BV650         | 1C3C65      | BioLegend    | 369316     |
|                        |                        | OX-40                  | APC           | Ber-ACT35   | BioLegend    | 350008     |
|                        |                        | PD-1                   | BV421         | EH12.1      | BD           | 565935     |
|                        | Intracellular staining | TNF                    | PE            | MAB11       | BioLegend    | 502908     |
|                        | Panel 3                | Extracellular staining | LD            | Zombie Aqua | -            | BioLegend  |
| CD127                  |                        |                        | PE-Dazzle 594 | A019D5      | BioLegend    | 351335     |
| CD8                    |                        |                        | APC           | RPA-T8      | BioLegend    | 301014     |
| CD3                    |                        |                        | PE-Cy5.5      | SK7         | eBioscience  | 35-0036-42 |
| CD4                    |                        |                        | APC-Cy7       | RPA-T4      | BD           | 557871     |
| CD25                   |                        |                        | PE-Cy7        | BC96        | BioLegend    | 302611     |
| Intracellular staining |                        | FoxP3                  | FITC          | PCH101      | Invitrogen   | 11-4776-42 |
| Extracellular staining |                        | Isotype control        | PE-Cy7        | MOPC-21     | BioLegend    | 400125     |
| Intracellular staining |                        | Isotype control        | FITC          | eBR2a       | eBioscience  | 11-4321-42 |

Note: All fluorophore-coupled antibodies were pre-titrated.

Staining protocol for Ab panels 1 and 2: For staining, cells were washed in FACS-buffer (PBS without Ca/Mg (Lonza), 0,02% NaN<sub>3</sub>, 2 mM EDTA (both Sigma-Aldrich) and 2% hi FBS (Capricorn Scientific) and stained extracellularly for 20 min at 4°C. After fixation and permeabilization for 20 min at 4°C (Cytotfix/Cytoperm, BD), cells were washed with permeabilization buffer (PBS 1X, 0,02% NaN<sub>3</sub>, 0,5% BSA and 0,1% Saponin (Sigma-Aldrich)) and stained intracellularly for 20 min at 4°C. Cells were finally washed with permeabilization buffer and resuspended in FACS-buffer before acquisition.

Staining protocol for Ab panel 3: Fc receptors were blocked by adding 10  $\mu$ l Fc block (BD, final concentration 0.25 mg/ml) for 10 min at room temperature (RT). Without a washing step, cells were extracellularly stained for 20 min at 4°C. Cells were thereafter washed twice, fixed, and permeabilized with 100  $\mu$ l fixation/permeabilization working solution (eBioscience™ Foxp3 / Transcription Factor Staining Buffer Set; Invitrogen) for 30 min at RT. Cells were washed twice with freshly prepared 1x permeabilization buffer (eBioscience Foxp3 / Transcription Factor Staining Buffer Set; Invitrogen). 200  $\mu$ l of permeabilization buffer was added for 15 min at RT. Cells were intracellularly stained with FoxP3 or isotype control antibodies for 30 min at RT. After washing (twice) with permeabilization buffer, cells were resuspended in FACS-buffer before acquisition. The isotype controls were used at the same concentration as the corresponding antibodies, one staining was performed per patient.



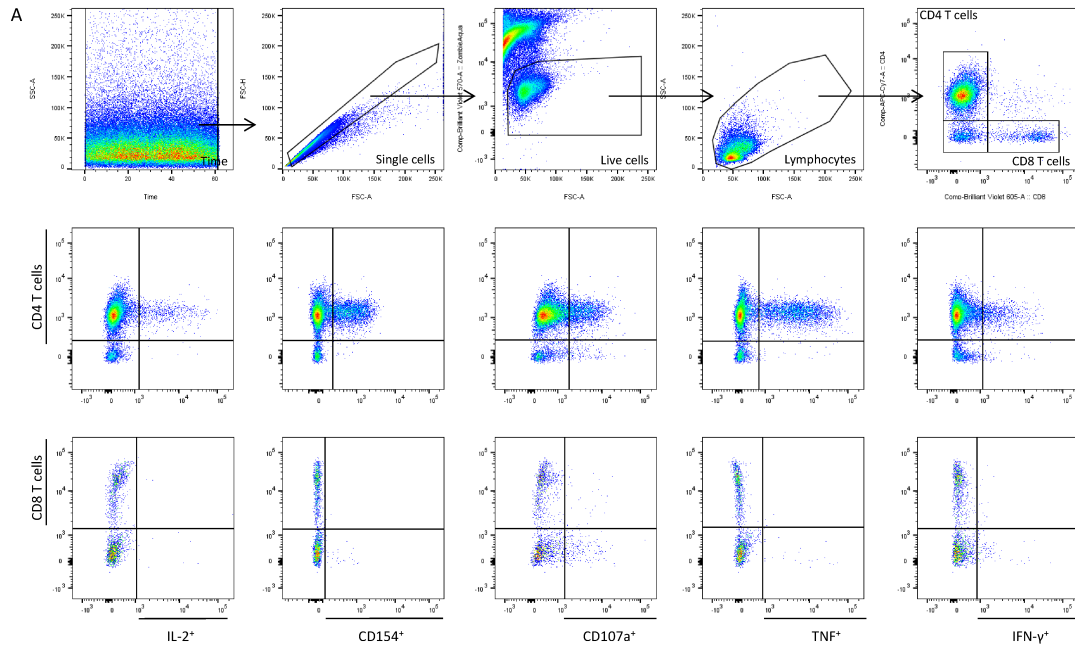



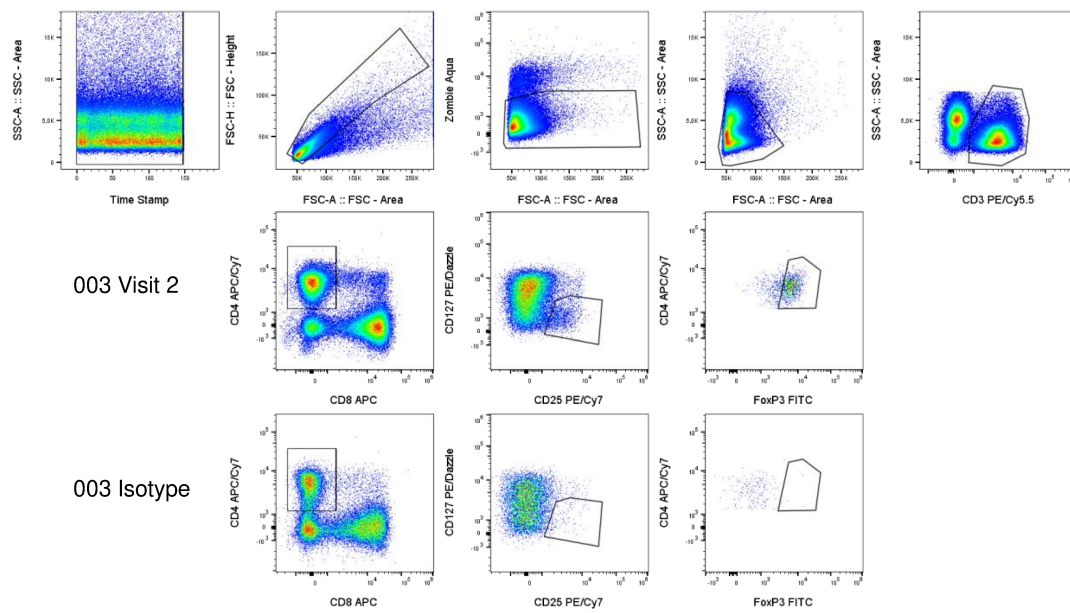

Supplementary figure S2: Gating strategy for the identification of Tregs.  $1.5 \times 10^6$  cells per test were treated with Fc block to avoid unspecific binding and stained (see online Supplementary table S5). Tregs were characterized as: sample flow over time, duplet exclusion (FSC-A/FSC-H), gating on live cells (FSC-A/Zombie Aqua dye), lymphocytes (FSC-A/SSC-A),  $CD3^+$  cells (upper row),  $CD8^-CD4^+$  T cells,  $CD127^-CD25^+$  cells,  $CD4^+FoxP3^+$  cells. Shown is one representative donor (003, middle row) at visit 2 and the respective isotype control (visit 17, bottom row).

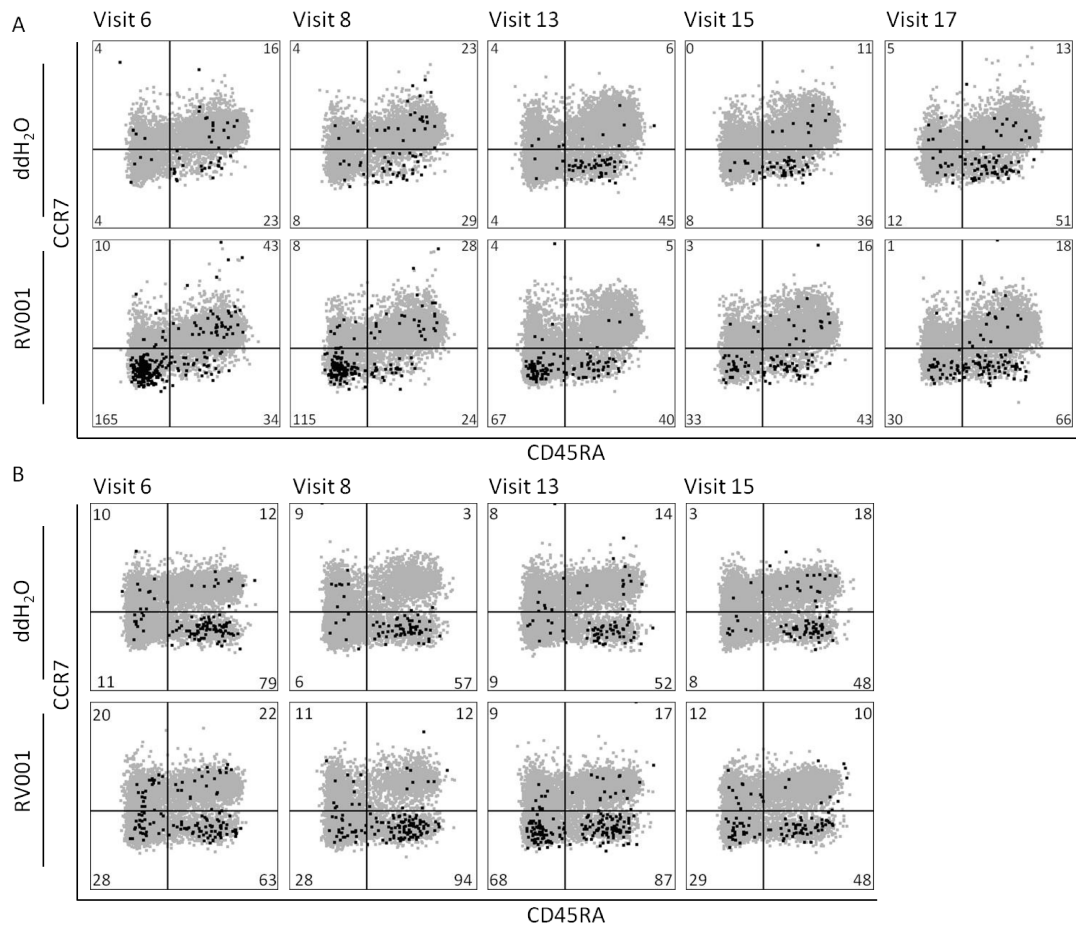

Supplementary figure S3: Additional results of the *ex vivo* analysis of RV001 specific CD4 T cells (see also Fig. 3). PBMCs from Patient 018 visit 6 to visit 18 (A) and Patient 005 visit 6 to visit 15 (B) were incubated with the RV001 peptide (lower row) or ddH<sub>2</sub>O (upper row) for 12 h. TNF<sup>+</sup> CD4 T cells were identified (black) and overlaid on the whole CD4 T cell population (grey). Numbers indicate the number the CD4<sup>+</sup>TNF<sup>+</sup> cell counts in each quadrant. For gating, see Figure S1A.

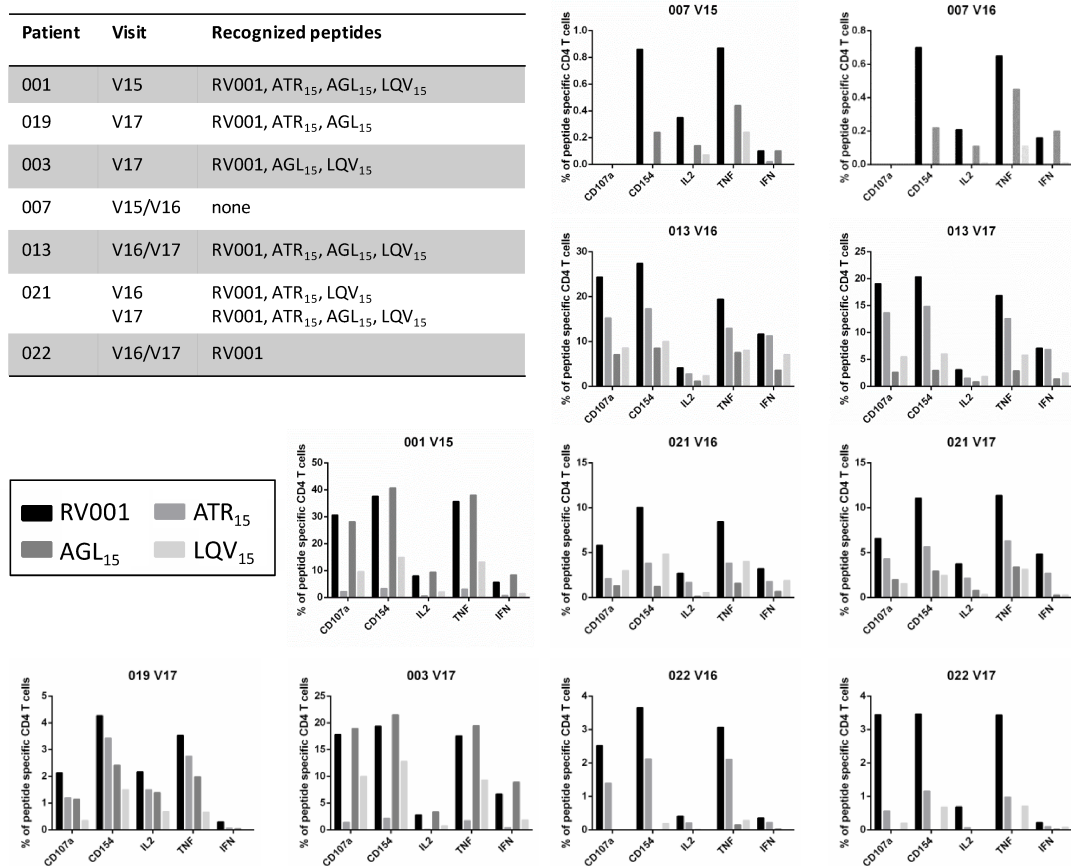

Supplementary figure S4: Additional ICS results for the identification of RV001-derived HLA-class II epitopes (see also Fig 4). Table: tested patients and visits, as well as the peptides recognized by patients' CD4 T cells (see Material and Methods). Bars indicate percentages of peptide-specific CD4 T cells expressing CD107a, CD154, IL-2, TNF, IFN- $\gamma$  (IFN) when re-stimulated for 12 h with the peptides RV001 (black), ATR<sub>15</sub> (middle grey), AGL<sub>15</sub> (dark grey), LQV<sub>15</sub> (light grey). For gating, see Figure S1B.

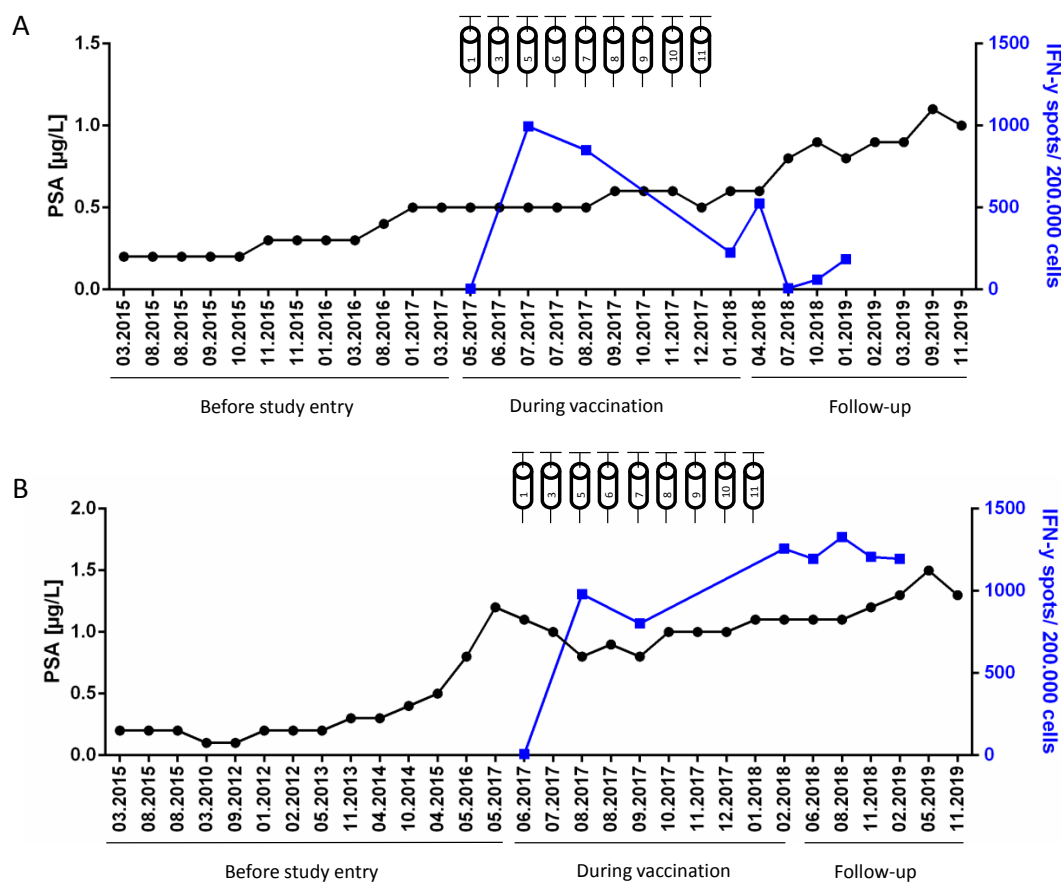

Figure S5: PSA level course before, during, and after vaccination for BCR patients at study entry ((A) Patient 006. (B) Patient 018). PSA levels (left y-axis) were measured by routine clinical testing at every patient visit before, during, and after vaccination (follow up) as indicated (x-axis). Corresponding IFN- $\gamma$  ELISpot counts per 200.000 cells (right y-axis) (see also results section and figure 1) are shown in blue. Syringes indicate times and number of vaccinations.
